# Supplementary material for: Detection of Particulate Matters with a Field-Portable Microscope Using Side-Illuminated Total Internal Reflection
Source: PubMed Central journal article supplement (PMC8070112; doi:10.3390/s21082745), 2021-04-13

# Supplementary Material

## Detection of particulate matters with a field-portable microscope using side illuminated total internal reflection

*Haechang Yang<sup>1,\*</sup>, Sanghoon Shin<sup>1,\*</sup>, Dongmin Seo<sup>2,\*</sup>, Jaewon Park<sup>3,†</sup>, and Sungkyu Seo<sup>1,†</sup>*

<sup>1</sup> Department of Electronics and Information Engineering, Korea University, Sejong, Republic of Korea

<sup>2</sup> Maritime Safety Research Division, Korea Research Institute of Ships & Ocean Engineering, Daejeon, Republic of Korea

<sup>3</sup> School of Microelectronics, Southern University of Science and Technology, Shenzhen, China

\* These authors equally contributed to this study.

† Correspondence to:

(S. Seo) E-mail; [sseo@korea.ac.kr](mailto:sseo@korea.ac.kr), Tel; +82-44-860-1427, Fax; +82-44-860-1585, Address; #415, Accelerator and ICT Bldg., Korea University, Sejong 30019, Republic of Korea

(J. Park) Email; [jwpark@sustech.edu](mailto:jwpark@sustech.edu), Tel; +86-755-8801-8574, Address; Southern University of Science and Technology, 1088 Xueyuan Avenue, Shenzhen, Guangdong, 518055, China

**Figure S1.** Side illuminated TIR system yielded more clear and identifiable images than traditional illumination when same experiment was done using ISO 12103-1 A1 ultrafine test dusts.

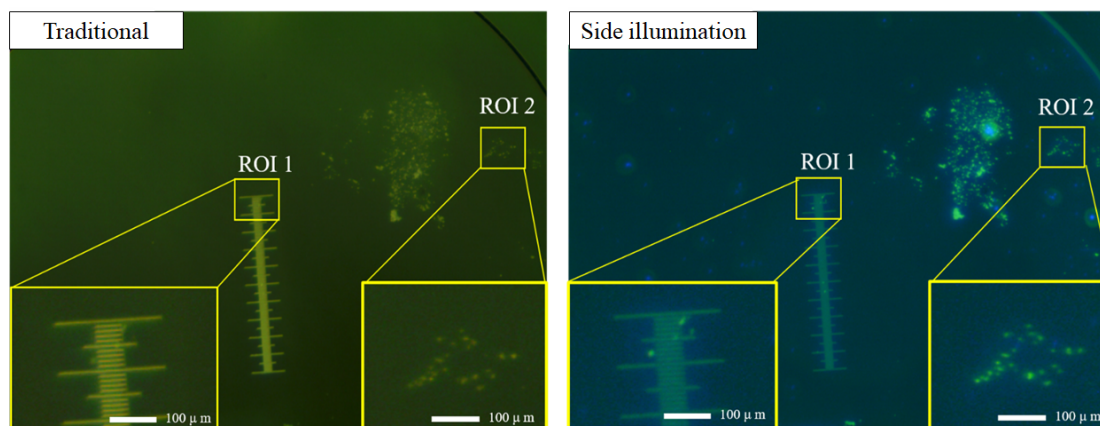

Supplement: sensors-21-02745-s001.pdf [file sensors-21-02745-s001.pdf]
